# Supplementary material for: Genetic modifiers of rare variants in monogenic developmental disorder loci
Source: PubMed Central journal article supplement (PMC11096126; doi:10.1038/s41588-024-01710-0), 2024-04-18
Supplement: 41588_2024_1710_MOESM1_ESM.pdf [file 41588_2024_1710_MOESM1_ESM.pdf]

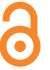

---

# Genetic modifiers of rare variants in monogenic developmental disorder loci

---

In the format provided by the authors and unedited

## SUPPLEMENTARY INFORMATION

### Table of contents

|                                                                                                                                                       |   |
|-------------------------------------------------------------------------------------------------------------------------------------------------------|---|
| Supplementary Fig. 1: Trait results across EA-PGS quintiles for variant carriers and non-carriers.                                                    | 2 |
| Supplementary Fig. 2: Sensitivity analysis of the additive effect of rare DD variant burden and EA-PGS on DD-related phenotypes.                      | 3 |
| Supplementary Fig. 3: Effect of rare DD variant burden and intelligence PGS on DD-related phenotypes.                                                 | 4 |
| Supplementary Fig. 4: Effect of rare DD variant burden and cognitive ability PGS on DD-related phenotypes.                                            | 5 |
| Supplementary Fig. 5: Average change in schizophrenia PGS and bipolar disorder PGS among rare DD variant carriers with a relevant clinical diagnosis. | 6 |
| Supplementary References                                                                                                                              | 7 |

**Supplementary Fig. 1: Trait results across EA-PGS quintiles for variant carriers and non-carriers.**  
 Data are presented as mean values +/- 95% confidence intervals.

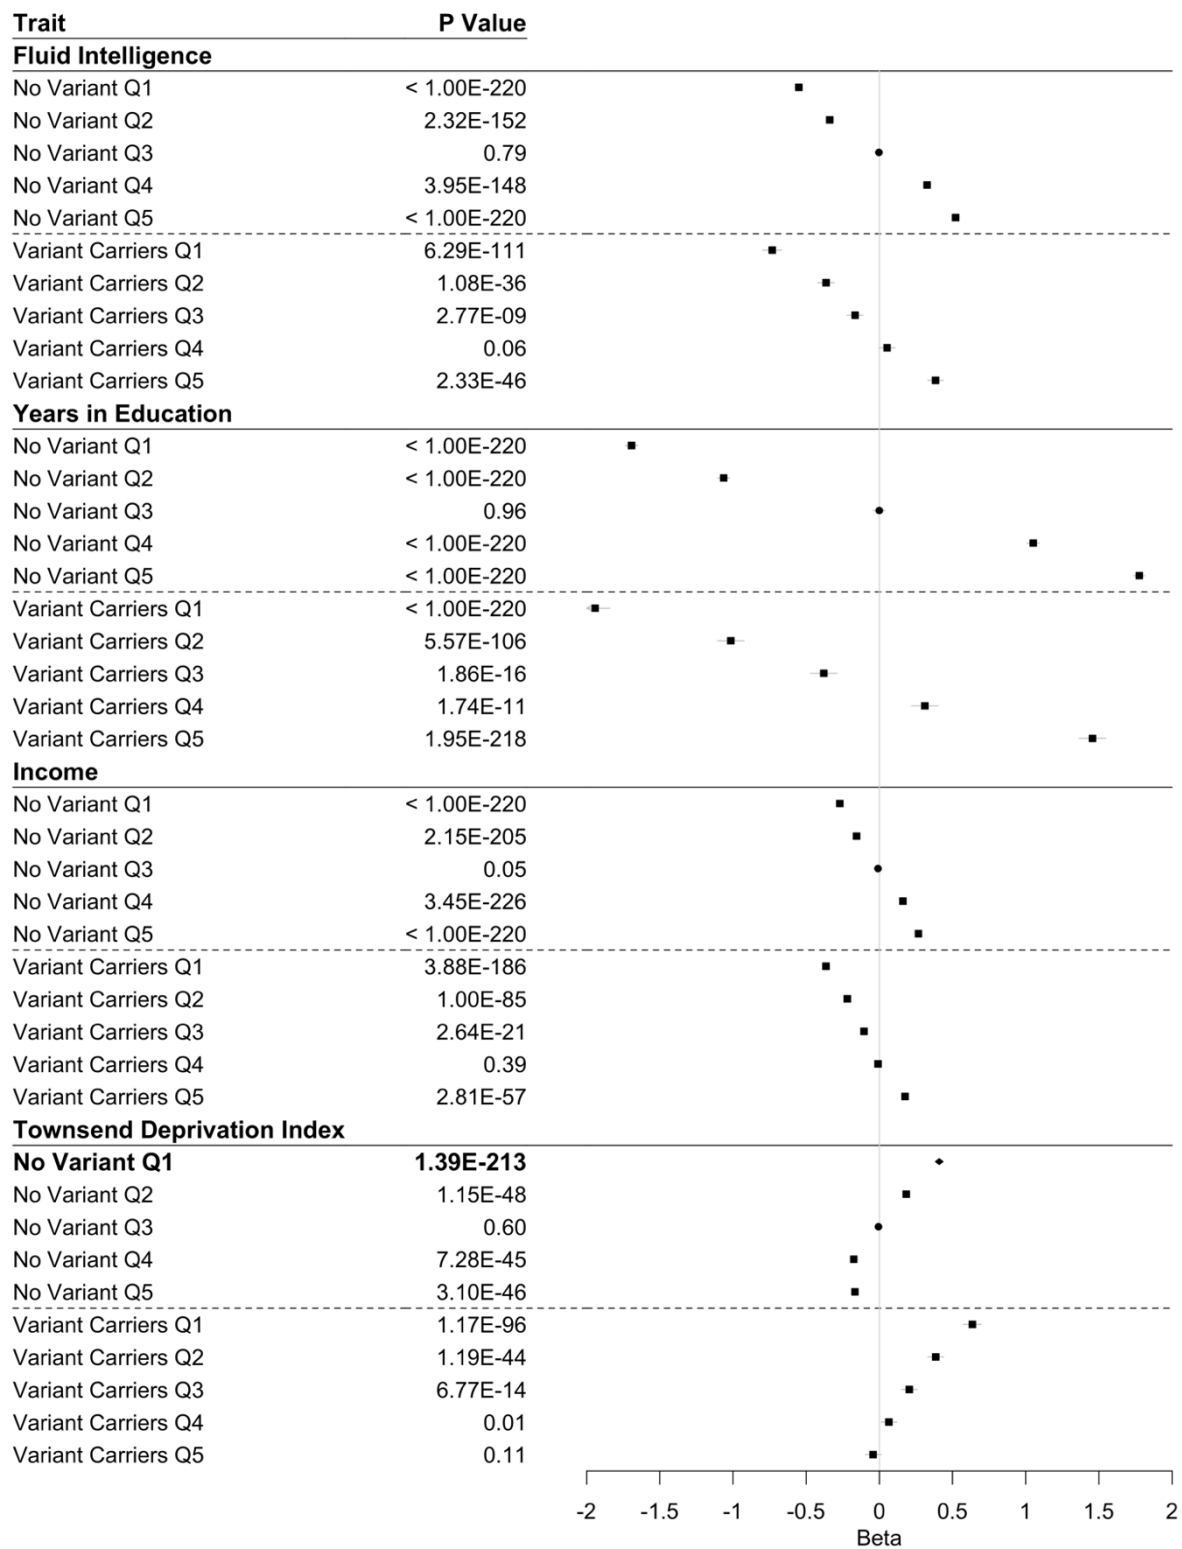

**Supplementary Fig. 2: Sensitivity analysis of the additive effect of rare DD variant burden and EA-PGS on DD-related phenotypes.**

This analysis used 74 SNPs from an EA GWAS that excluded UKB, Okbay *et al.* 2016<sup>1</sup>. Data are presented as mean values +/- 95% confidence intervals.

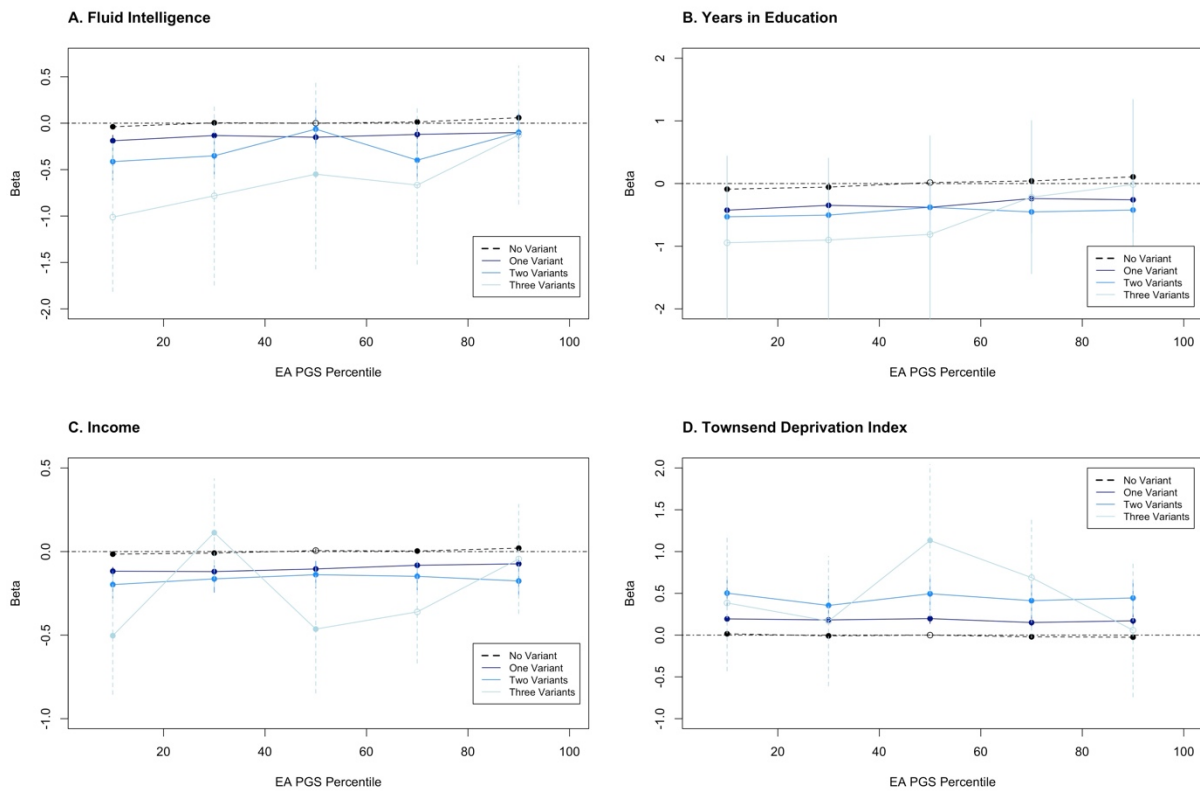

**Supplementary Fig. 3: Effect of rare DD variant burden and intelligence PGS on DD-related phenotypes.**

Intelligence PGS is derived from Savage *et al.* 2018<sup>2</sup> and Data are presented as mean values +/- 95% confidence intervals.

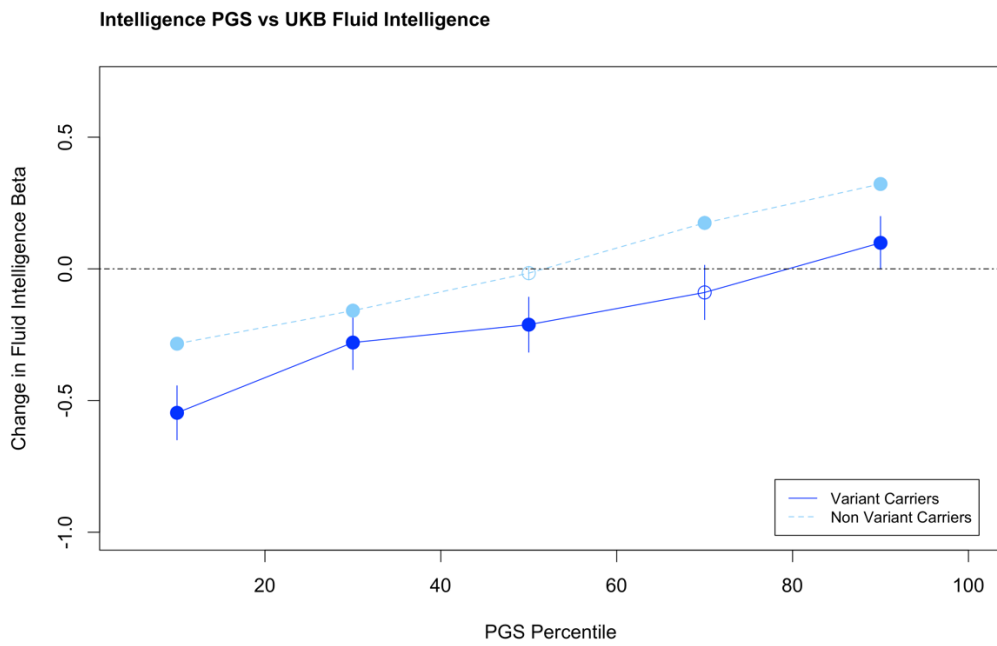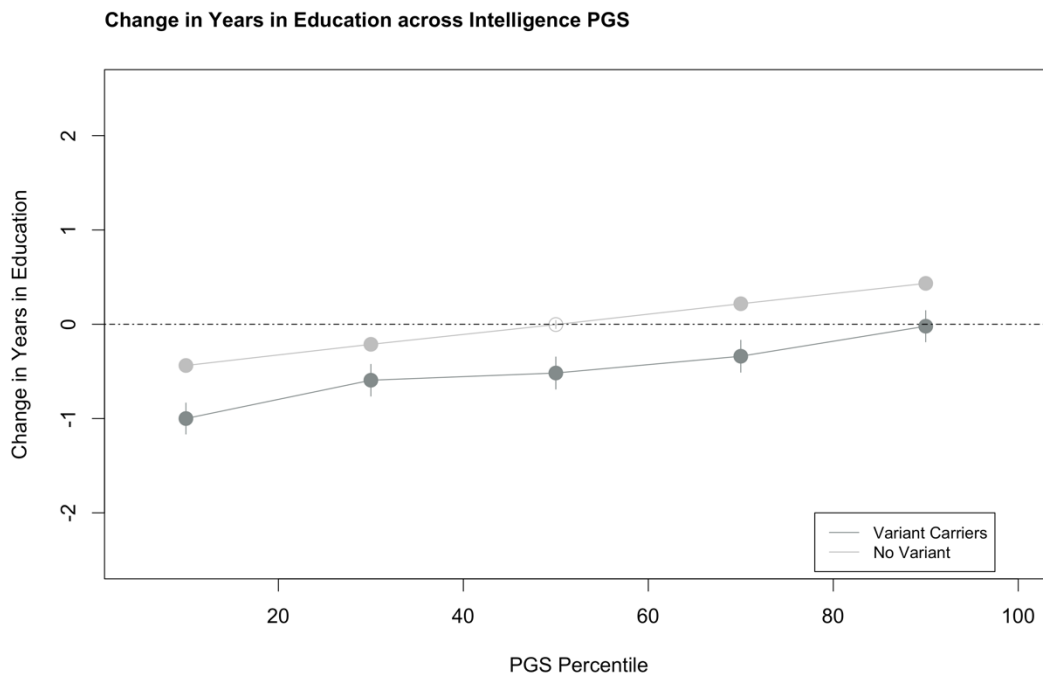

**Supplementary Fig. 4: Effect of rare DD variant burden and cognitive ability PGS on DD-related phenotypes.**

Cognitive ability PGS is derived Genç *et al* 2021<sup>3</sup>. Data are presented as mean values +/- 95% confidence intervals.

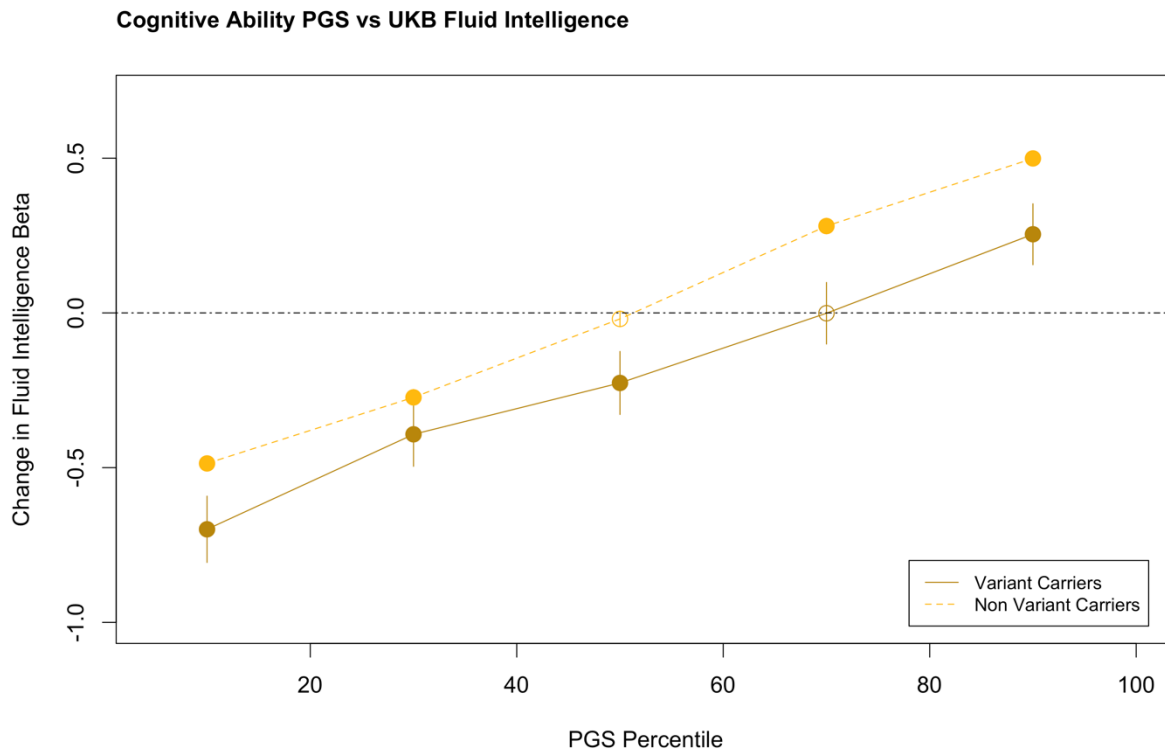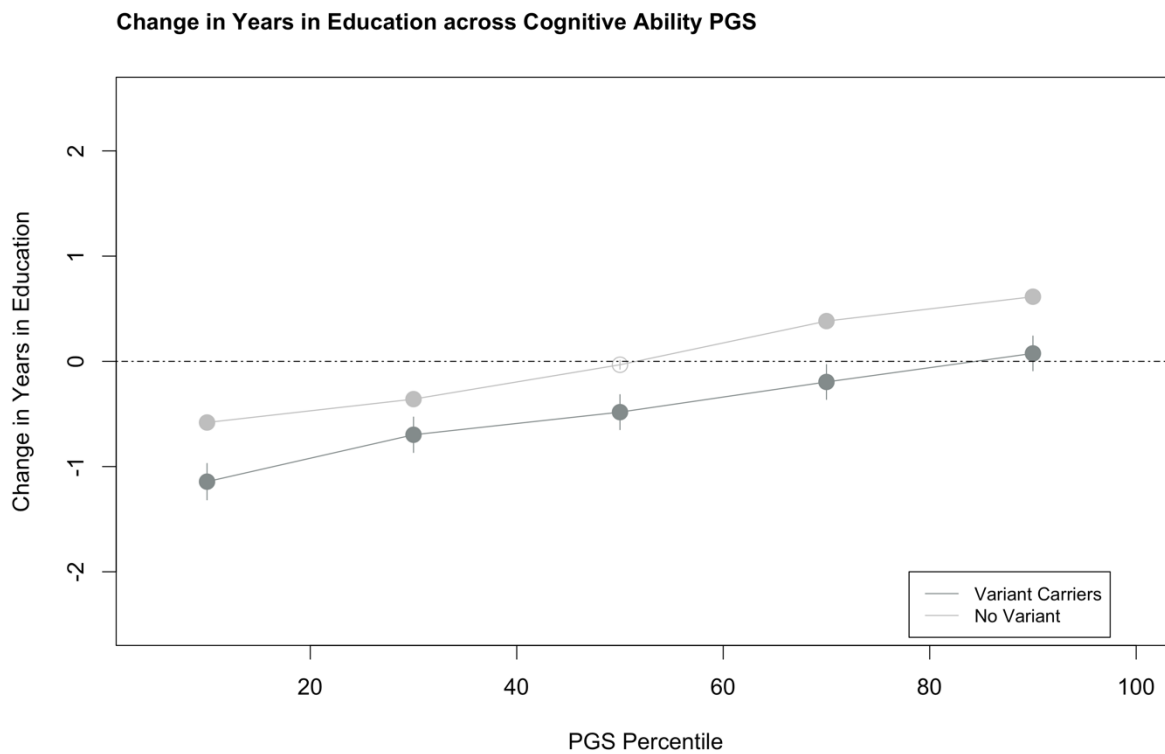

**Supplementary Fig. 5: Average change in schizophrenia PGS and bipolar disorder PGS among rare DD variant carriers with a relevant clinical diagnosis.**

Data are presented as mean values +/- 95% confidence intervals.

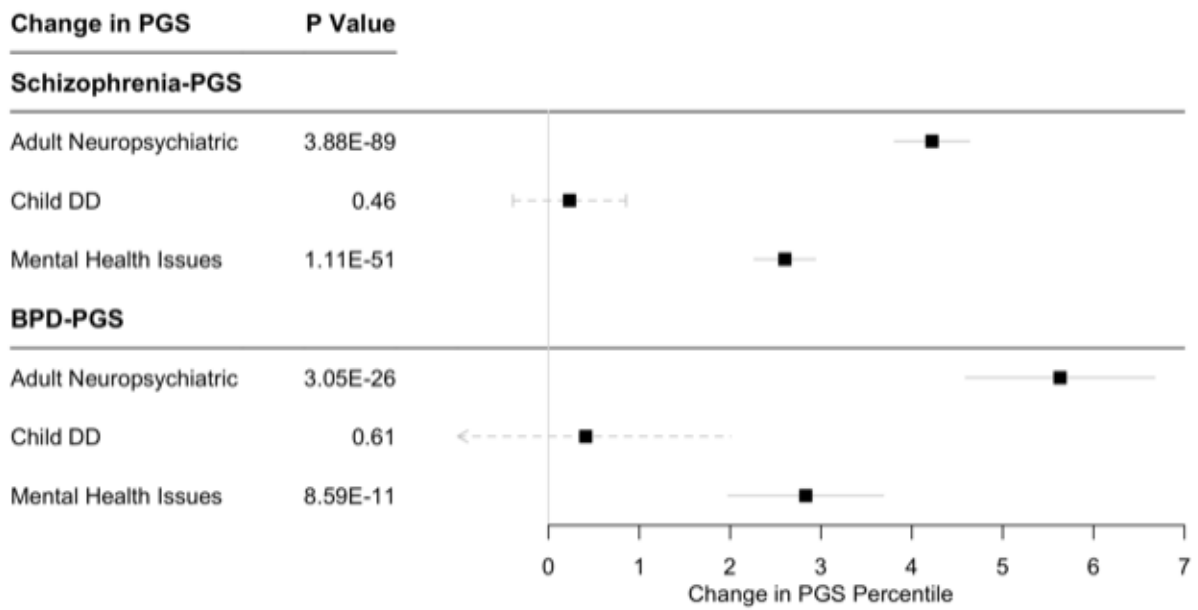

## Supplementary References

1. Okbay, A. *et al.* Genome-wide association study identifies 74 loci associated with educational attainment. *Nature* **533**, 539–542 (2016).
2. Savage, J. E. *et al.* Genome-wide association meta-analysis in 269,867 individuals identifies new genetic and functional links to intelligence. *Nat. Genet.* **50**, 912–919 (2018)
3. Genç, E. *et al.* Polygenic Scores for Cognitive Abilities and Their Association with Different Aspects of General Intelligence—A Deep Phenotyping Approach. *Mol. Neurobiol.* **58**, 4145–4156 (2021).
